# Supplementary material for: Identifying inhibitory compounds in lignocellulosic biomass hydrolysates using an exometabolomics approach
Source: PubMed Central journal article supplement (PMC3998114; doi:10.1186/1472-6750-14-22), 2014-03-21

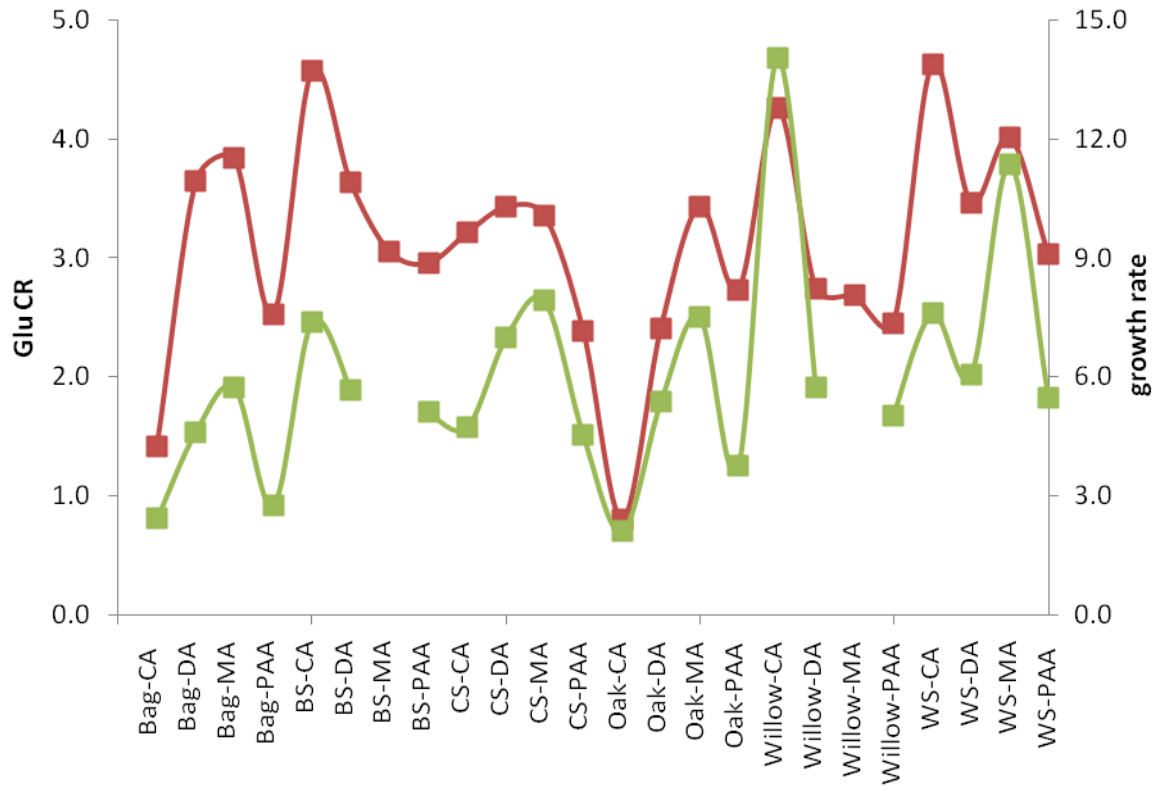

Supplement: 1472-6750-14-22-S1.pdf [file 1472-6750-14-22-S1.pdf]
