# Supplementary material for: Identifying inhibitory compounds in lignocellulosic biomass hydrolysates using an exometabolomics approach
Source: Springer Nature journal article supplement (doi:10.1186/1472-6750-14-22), 2014-03-21

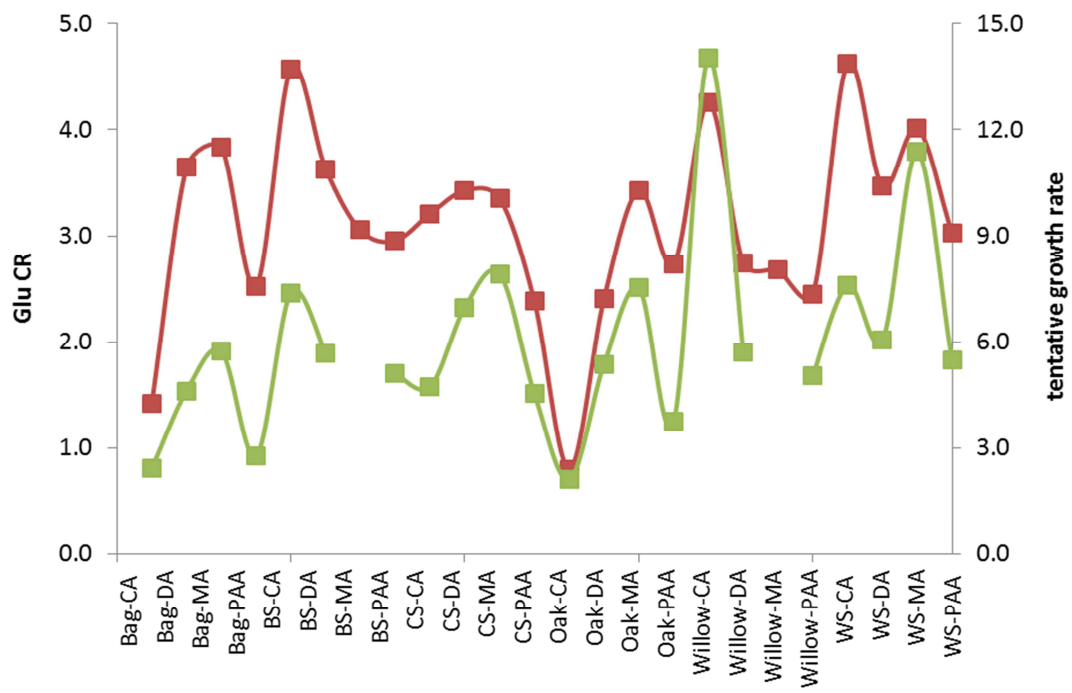

Supplement: 12896_2013_897_MOESM7_ESM.pdf [file 12896_2013_897_MOESM7_ESM.pdf]
